# Supplementary material for: Enhanced sodium ion mobility in sodium tellurosilicates and crystal structures of Na4SiTe4 and Na10Si2Te9 with isolated [SiTe4]4− tetrahedra and isolated Te2− anions
Source: Royal Society of Chemistry journal article supplement (doi:10.1039/d4dt01717j), 2024-01-01
Supplement: d4dt01717j1.pdf [file d4dt01717j1.pdf]

**Supporting Information:**

**Enhanced sodium ion mobility in sodium  
tellurosilicates and crystal structures of  $\text{Na}_4\text{SiTe}_4$   
and  $\text{Na}_{10}\text{Si}_2\text{Te}_9$  with isolated  $[\text{SiTe}_4]^{4-}$  tetrahedra  
and isolated  $\text{Te}^{2-}$  anions**

Franziska Kamm, Florian Pielhofer,\* Marc Schlosser, and Arno Pfitzner\*

*Institut für anorganische Chemie, Universität Regensburg, 93053 Regensburg, Germany*

E-mail: florian.pielhofer@ur.de; arno.pfitzner@ur.de

# Contents

|          |                                                                         |             |
|----------|-------------------------------------------------------------------------|-------------|
| <b>1</b> | <b>Na<sub>4</sub>SiTe<sub>4</sub></b>                                   | <b>S-3</b>  |
| <b>2</b> | <b>Na<sub>10</sub>Si<sub>2</sub>Te<sub>9</sub></b>                      | <b>S-4</b>  |
| 2.1      | Structure Determination from Single Crystal X-ray Diffraction . . . . . | S-4         |
| 2.2      | Structure Determination from Powder X-ray Diffraction . . . . .         | S-11        |
| <b>3</b> | <b>Na<sub>6</sub>Si<sub>2</sub>Te<sub>6</sub></b>                       | <b>S-15</b> |
| <b>4</b> | <b>Na<sub>8</sub>Si<sub>4</sub>Te<sub>10</sub></b>                      | <b>S-16</b> |
| <b>5</b> | <b>Impedance Spectroscopy</b>                                           | <b>S-17</b> |
| <b>6</b> | <b>Calculation Details</b>                                              | <b>S-18</b> |
|          | <b>References</b>                                                       | <b>S-21</b> |

# 1 Na<sub>4</sub>SiTe<sub>4</sub>

Table S1: Crystallographic data and details of structure determination of Na<sub>4</sub>SiTe<sub>4</sub>.

|                                                            |                                       |
|------------------------------------------------------------|---------------------------------------|
| chemical formula                                           | Na <sub>4</sub> SiTe <sub>4</sub>     |
| powder color                                               | yellow                                |
| $T$ / K                                                    | 293                                   |
| crystal system                                             | cubic                                 |
| space group                                                | $Pa\bar{3}$ (No. 205)                 |
| $a$ / Å                                                    | 13.0312(5)                            |
| $V$ / Å <sup>3</sup>                                       | 2212.84(2)                            |
| formula units $Z$                                          | 8                                     |
| calculated density $\rho_{calc}$ / g cm <sup>-3</sup>      | 3.7847                                |
| diffractometer                                             | STOE Stadi P, Debye-Scherrer geometry |
| radiation                                                  | MoK $\alpha$ ( $\lambda = 0.70930$ Å) |
| measurement range $2\Theta_{min}$ / $2\Theta_{max}$        | 2.000° / 61.385°                      |
| $2\Theta$ step                                             | 0.015°                                |
| number of parameters / restraints                          | 19 / 0                                |
| $R_P$ , $wR_P$ , $R_{exp}$                                 | 0.0422, 0.0567, 0.0326                |
| goodness of fit                                            | 1.74                                  |
| $R_{gt}$ , $wR_{gt}$ ( $I > 3\sigma$ )                     | 0.0408, 0.0469                        |
| $R_{all}$ , $wR_{all}$                                     | 0.0447, 0.0476                        |
| $\Delta\rho_{min}$ , $\Delta\rho_{max}$ / e/Å <sup>3</sup> | -1.36, 1.15                           |

Table S2: Atomic coordinates and isotropic displacement parameters for Na<sub>4</sub>SiTe<sub>4</sub>.

| atom | wyck. position | $x$       | $y$        | $z$        | $U_{eq}$ / Å <sup>2</sup> |
|------|----------------|-----------|------------|------------|---------------------------|
| Na1  | 24 <i>d</i>    | 0.7370(7) | 0.2987(4)  | 0.4850(8)  | 0.048(2)                  |
| Na2  | 4 <i>a</i>     | 0         | 0          | 0          | 0.04(1)                   |
| Na3  | 4 <i>b</i>     | 1/2       | 1/2        | 1/2        | 0.04(1)                   |
| Si   | 8 <i>c</i>     | 0.6372(4) | $x$        | $x$        | 0.014(2)                  |
| Te1  | 24 <i>d</i>    | 0.7490(1) | 0.54036(5) | 0.51226(7) | 0.0260(3)                 |
| Te2  | 8 <i>c</i>     | 0.7456(1) | $x$        | $x$        | 0.0275(5)                 |

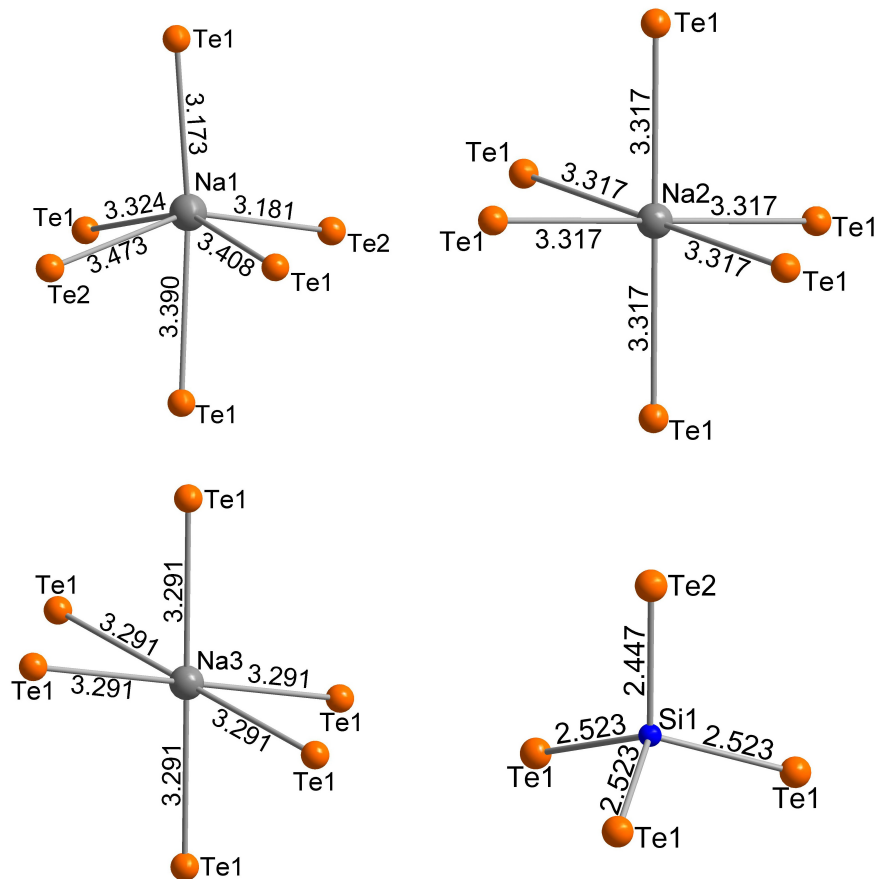

Figure S1: Coordination polyhedra of Na and Si in  $\text{Na}_4\text{SiTe}_4$  with distances in Å.

## 2 $\text{Na}_{10}\text{Si}_2\text{Te}_9$

### 2.1 Structure Determination from Single Crystal X-ray Diffraction

Due to various problems during the structure determination of  $\text{Na}_{10}\text{Si}_2\text{Te}_9$  several different crystals were measured at different temperatures and two different diffractometers (Rigaku SuperNova and Rigaku Synergy, DW systems) to exclude artifacts from bad crystal quality of individual crystals.

All determined structure models show rather high residual electron densities and  $R$  values are higher than expected. This can have various reasons, e.g. the assumed symmetry is



higher than the real symmetry or the measured data is affected by twinning which is leading to a wrong crystal structure.

The measured reflections can be indexed with a unit cell with orthorhombic metric. In all cases, more than 90 % of the reflections can be indexed. The measured diffraction pattern was also checked for twinning by the twin unit cell finding algorithm which is implemented in *CrysAlisPro*<sup>S1</sup>, but only small parts of unindexed reflections can be indexed to a second unit cell with the same lattice dimensions.

The orthorhombic metric, the statistics of  $E^2 - 1$  and the observed absence conditions lead to the centrosymmetric space group *Pbcn* (No. 60). A structure model with both isolated  $[\text{SiTe}_4]^{4-}$  tetrahedra and isolated  $\text{Te}^{2-}$  units with the composition  $\text{Na}_{10}\text{Si}_2\text{Te}_9$  or  $\text{Na}_{10}(\text{SiTe}_4)_2\text{Te}$ , respectively was obtained from structure solution with direct methods. Though the structure model seems reasonable from a chemical point of view, the structure refinement was not entirely satisfactory. The resulting crystal structure exhibits high residual electron density around Te with distances less than 1 Å and converges with unexpected high *R* values. The crystallographic data and details of structure determination are shown in Table S3, exemplary for one of the analyzed crystals. Additionally, the structure exhibits some splitted sodium positions with a reduced occupancy of 50 % and short interatomic distances.

By refinement as inversion twin in space group *Pna2<sub>1</sub>* (No. 33), which is a subgroup of *Pbcn*, the suspicious sodium positions can be resolved to fully occupied positions with coordination spheres as expected. Also the *R* values dropped to more reasonable values. Besides that, the residual electron density remains higher as can be expected. The resulting crystallographic data and details of the structure determination are listed in Table S4. Note that all given data (refinement in *Pbcn* and *Pna2<sub>1</sub>*) stems from the same measurement data.

To solve the problematic residual electron density (Figure S4), different further orthorhombic, monoclinic and triclinic space groups were tested. Also various twinning options did not lead to reasonable structure solutions.

Table S3: Crystallographic data and details of structure determination of  $\text{Na}_{10}\text{Si}_2\text{Te}_9$  from single crystal X-ray diffraction in the centrosymmetric space group  $Pbcn$ .

|                                                                              |                                                       |
|------------------------------------------------------------------------------|-------------------------------------------------------|
| chemical formula                                                             | $\text{Na}_{10}\text{Si}_2\text{Te}_9$                |
| chemical formula weight / $\text{g mol}^{-1}$                                | 1434.5                                                |
| crystal color                                                                | red                                                   |
| $T$ / K                                                                      | 100.1(4)                                              |
| crystal system                                                               | orthorhombic                                          |
| space group                                                                  | $Pbcn$ (No. 60)                                       |
| $a$ / $\text{\AA}$                                                           | 12.9530(7)                                            |
| $b$ / $\text{\AA}$                                                           | 14.8399(8)                                            |
| $c$ / $\text{\AA}$                                                           | 12.8235(7)                                            |
| $V$ / $\text{\AA}^3$                                                         | 2464.9(2)                                             |
| formula units $Z$                                                            | 4                                                     |
| calculated density $\rho_{\text{calc}}$ / $\text{g cm}^{-3}$                 | 3.8654                                                |
| diffractometer                                                               | Rigaku XtaLAB Synergy R, DW system,<br>HyPix-Arc 150  |
| radiation                                                                    | $\text{MoK}\alpha$ ( $\lambda = 0.71073 \text{\AA}$ ) |
| measurement method                                                           | $\omega$ - scans                                      |
| measurement range $2\Theta_{\text{min}}$ / $2\Theta_{\text{max}}$            | $2.09^\circ$ / $39.85^\circ$                          |
| index range $hkl$                                                            | $-21 < h < 23, -26 < k < 24, -22 < l < 22$            |
| measured / independent reflections ( $R_{\text{int}}$ )                      | 66640 / 7335 (0.0332)                                 |
| absorption coefficient $\mu_{\text{MoK}\alpha}$                              | $10.746 \text{ mm}^{-1}$                              |
| absorption correction                                                        | gaussian                                              |
| transmission $T_{\text{min}}, T_{\text{max}}$                                | 0.622 / 0.764                                         |
| structure solution                                                           | <i>Superflip</i>                                      |
| structure refinement                                                         | <i>Jana2006</i>                                       |
| data / restraints / parameter                                                | 7335 / 0 / 105                                        |
| goodness of fit                                                              | 2.95                                                  |
| final $R, wR$ [ $I \geq 2\sigma(I)$ ]                                        | 4.60, 10.60                                           |
| final $R, wR$ [all data]                                                     | 5.62, 10.71                                           |
| $\Delta\rho_{\text{min}}, \Delta\rho_{\text{max}}$ / $\text{e}/\text{\AA}^3$ | -5.94, 9.93                                           |

Table S4: Crystallographic data and details of structure determination of Na<sub>10</sub>Si<sub>2</sub>Te<sub>9</sub> from single crystal X-ray diffraction in space group *Pna2*<sub>1</sub>.

|                                                                |                                                               |
|----------------------------------------------------------------|---------------------------------------------------------------|
| chemical formula                                               | Na <sub>10</sub> Si <sub>2</sub> Te <sub>9</sub>              |
| chemical formula weight / g mol <sup>-1</sup>                  | 1434.5                                                        |
| crystal color                                                  | red                                                           |
| <i>T</i> / K                                                   | 100.1(4)                                                      |
| crystal system                                                 | orthorhombic                                                  |
| space group                                                    | <i>Pna2</i> <sub>1</sub> (No. 33)                             |
| <i>a</i> / Å                                                   | 12.8235(7)                                                    |
| <i>b</i> / Å                                                   | 14.8398(8)                                                    |
| <i>c</i> / Å                                                   | 12.9530(7)                                                    |
| <i>V</i> / Å <sup>3</sup>                                      | 2464.9(2)                                                     |
| formula units <i>Z</i>                                         | 4                                                             |
| calculated density $\rho_{calc}$ / g cm <sup>-3</sup>          | 3.8654                                                        |
| diffractometer                                                 | Rigaku XtaLAB Synergy R, DW system,<br>HyPix-Arc 150          |
| radiation                                                      | MoK $\alpha$ ( $\lambda = 0.71073$ Å)                         |
| measurement method                                             | $\omega$ - scans                                              |
| measurement range $2\Theta_{min}$ / $2\Theta_{max}$            | 2.09° / 39.85°                                                |
| index range <i>hkl</i>                                         | -23 < <i>h</i> < 21, -26 < <i>k</i> < 24, -22 < <i>l</i> < 22 |
| measured / independent reflections ( <i>R</i> <sub>int</sub> ) | 67682 / 11789 (0.0294)                                        |
| absorption coefficient $\mu_{MoK\alpha}$                       | 10.746 mm <sup>-1</sup>                                       |
| absorption correction                                          | gaussian                                                      |
| transmission <i>T</i> <sub>min</sub> , <i>T</i> <sub>max</sub> | 0.614 / 0.747                                                 |
| structure solution                                             | <i>Superflip</i>                                              |
| structure refinement                                           | <i>Jana2006</i>                                               |
| data / restraints / parameter                                  | 14472 / 0 / 190                                               |
| goodness of fit                                                | 1.65                                                          |
| final <i>R</i> , <i>wR</i> [ <i>I</i> ≥ 2σ( <i>I</i> )]        | 3.23, 6.62                                                    |
| final <i>R</i> , <i>wR</i> [all data]                          | 4.37, 6.79                                                    |
| $\Delta\rho_{min}$ , $\Delta\rho_{max}$ / e/Å <sup>3</sup>     | -4.93, 8.06                                                   |

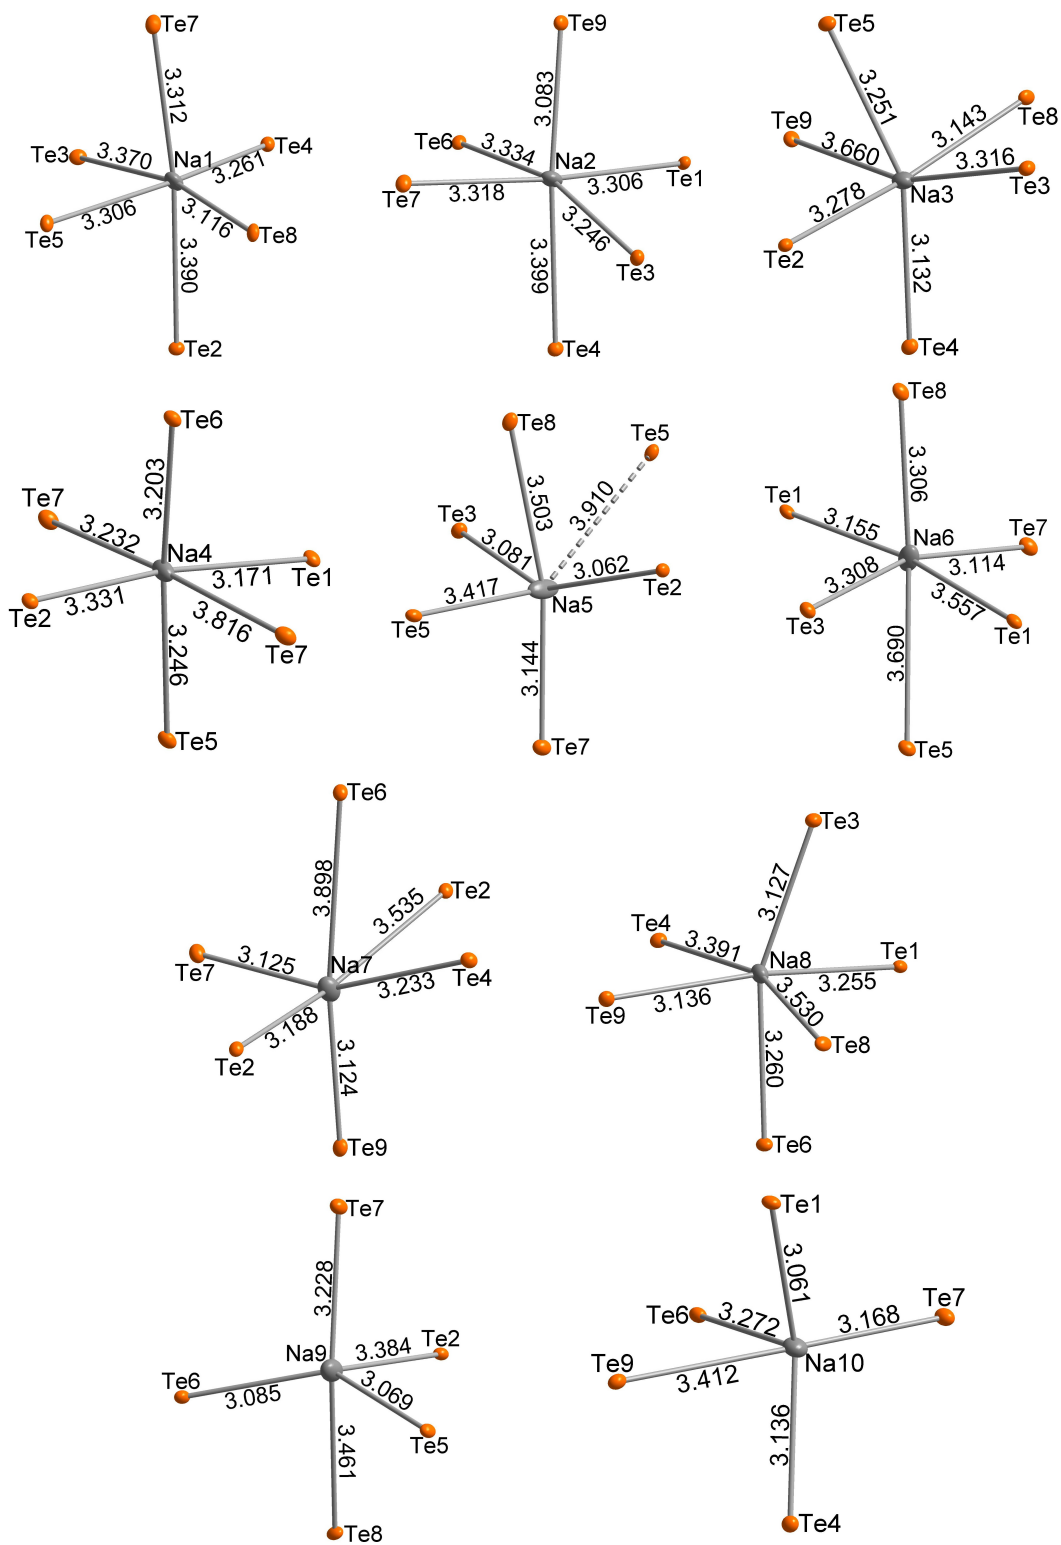

Figure S2: Coordination polyhedra of Na in  $\text{Na}_{10}\text{Si}_2\text{Te}_9$  with distances in Å.

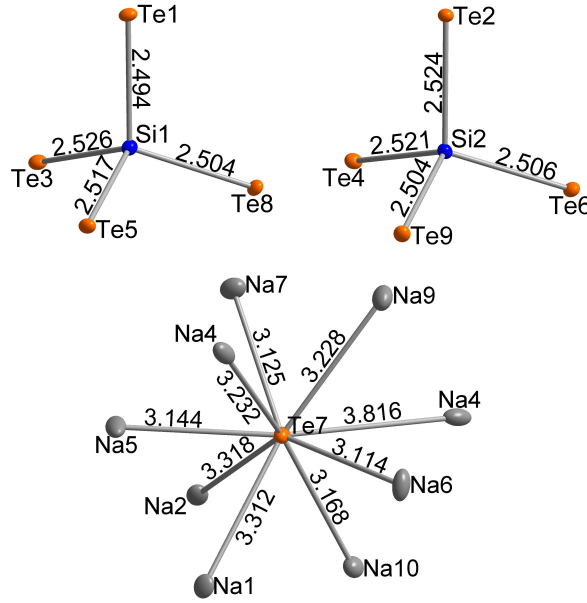

Figure S3: Coordination polyhedra of Si and Te9 in  $\text{Na}_{10}\text{Si}_2\text{Te}_9$  with distances in Å.

Table S5: Atomic coordinates and isotropic displacement parameters for  $\text{Na}_{10}\text{Si}_2\text{Te}_9$  from single crystal X-ray diffraction.

| atom | wyck. position | $x$        | $y$        | $z$        | $U_{eq} / \text{Å}^2$ |
|------|----------------|------------|------------|------------|-----------------------|
| Na1  | $4a$           | 0.1682(2)  | 0.4751(2)  | -0.3719(3) | 0.0167(8)             |
| Na2  | $4a$           | -0.1654(2) | 0.0285(2)  | 0.3684(3)  | 0.0179(8)             |
| Na3  | $4a$           | 0.0839(3)  | 0.6406(2)  | -0.9438(3) | 0.0197(9)             |
| Na4  | $4a$           | -0.0242(2) | 1.2537(2)  | 0.0043(2)  | 0.0206(6)             |
| Na5  | $4a$           | 0.0650(3)  | 0.5454(2)  | -0.6053(3) | 0.030(1)              |
| Na6  | $4a$           | -0.2251(3) | -0.2388(2) | 0.7128(2)  | 0.0234(8)             |
| Na7  | $4a$           | 0.2248(3)  | 0.7251(2)  | -0.7294(3) | 0.0219(7)             |
| Na8  | $4a$           | -0.0903(2) | -0.1406(2) | 0.9419(3)  | 0.0163(8)             |
| Na9  | $4a$           | -0.2174(2) | -0.3650(2) | 0.4565(2)  | 0.0254(7)             |
| Na10 | $4a$           | -0.0591(2) | -0.0481(2) | 0.5971(3)  | 0.0178(8)             |
| Si1  | $4a$           | 0.5071(2)  | 0.8490(1)  | -0.2217(2) | 0.0101(5)             |
| Si2  | $4a$           | -0.5072(2) | -0.3510(1) | 0.2242(1)  | 0.0089(5)             |
| Te1  | $4a$           | 0.5450(1)  | 0.6883(1)  | -0.2636(1) | 0.0093(1)             |
| Te2  | $4a$           | -0.5476(1) | -0.1886(1) | 0.2662(1)  | 0.0086(1)             |
| Te3  | $4a$           | 0.3678(1)  | 0.8470(1)  | -0.0837(1) | 0.0108(1)             |
| Te4  | $4a$           | -0.3696(1) | -0.3462(1) | 0.0854(1)  | 0.0099(1)             |
| Te5  | $4a$           | 0.4350(1)  | 0.9301(1)  | -0.3767(1) | 0.0101(1)             |
| Te6  | $4a$           | -0.4327(1) | -0.4288(1) | 0.3793(1)  | 0.0096(1)             |
| Te7  | $4a$           | 0.2511(1)  | 0.6518(1)  | -0.5047(1) | 0.0127(1)             |
| Te8  | $4a$           | 0.6665(1)  | 0.9289(1)  | -0.1580(1) | 0.0102(1)             |
| Te9  | $4a$           | -0.6635(1) | -0.4334(1) | 0.1568(1)  | 0.0102(1)             |

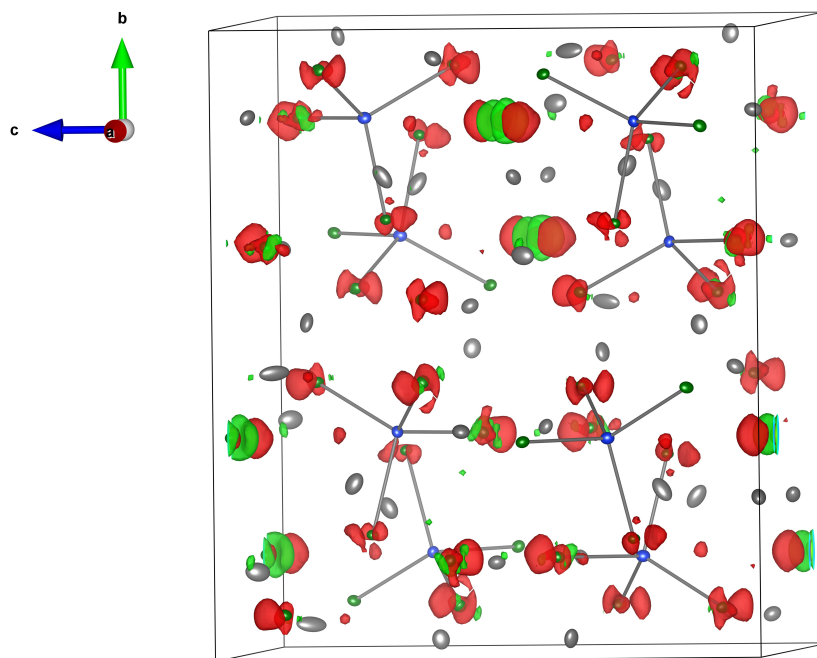

Figure S4: Difference Fourier map ( $F(\text{obs})-F(\text{calc})$ ) with residual electron density near Te. For rendering a isosurface level of 1.2 was used.

Table S6: EDX analysis of crystalline  $\text{Na}_{10}\text{Si}_2\text{Te}_9$ . The analysis confirms the composition determined from X-ray diffraction experiments, which corresponds to 47.62 atom-% for Na, 9.52 atom-% for Si and 42.86 atom-% for Te.

| element | mass norm. /% | atom-% | abs. error / % | rel. error / % |
|---------|---------------|--------|----------------|----------------|
| Na      | 15.73         | 46.68  | 0.96           | 6.36           |
| Si      | 4.36          | 10.58  | 0.20           | 4.78           |
| Te      | 79.92         | 42.73  | 2.28           | 2.96           |

## 2.2 Structure Determination from Powder X-ray Diffraction

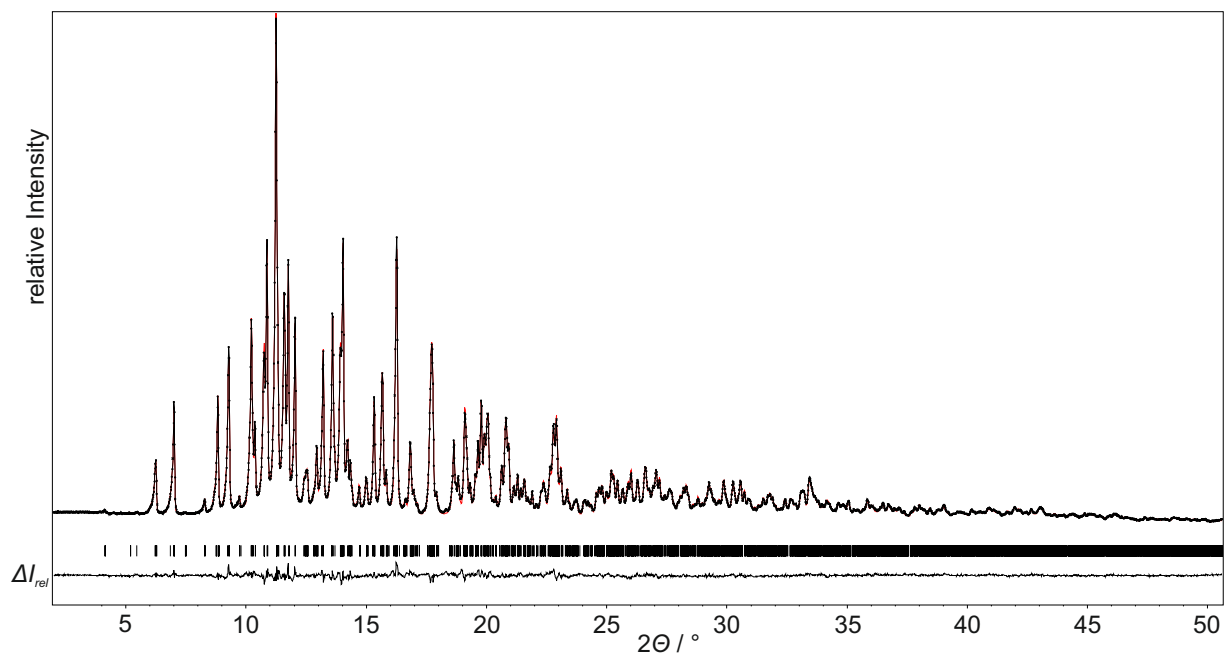

Figure S5: Powder diffraction pattern of  $\text{Na}_{10}\text{Si}_2\text{Te}_9$  with difference plot from Rietveld refinement. The diffraction pattern was measured with  $\text{MoK}\alpha_1$  radiation ( $\lambda = 0.7093 \text{ \AA}$ ) at room temperature. For the structure refinement the structure model from single crystal diffraction was used.

Table S7: Crystallographic data and details of structure determination of  $\text{Na}_{10}\text{Si}_2\text{Te}_9$  from powder X-ray diffraction.

|                                                                     |                                                      |
|---------------------------------------------------------------------|------------------------------------------------------|
| chemical formula                                                    | $\text{Na}_{10}\text{Si}_2\text{Te}_9$               |
| powder color                                                        | orange                                               |
| $T / \text{K}$                                                      | 293                                                  |
| crystal system                                                      | orthorhombic                                         |
| space group                                                         | $Pna2_1$ (No. 33)                                    |
| $a / \text{\AA}$                                                    | 12.9790(2)                                           |
| $b / \text{\AA}$                                                    | 14.9308(2)                                           |
| $c / \text{\AA}$                                                    | 13.0670(1)                                           |
| $V / \text{\AA}^3$                                                  | 2532.21(5)                                           |
| formula units $Z$                                                   | 4                                                    |
| calculated density $\rho_{\text{calc}} / \text{g cm}^{-3}$          | 3.7627                                               |
| diffractometer                                                      | STOE Stadi P, Debye-Scherrer geometry                |
| radiation                                                           | $\text{MoK}\alpha$ ( $\lambda = 0.7093 \text{\AA}$ ) |
| measurement range $2\Theta_{\text{min}} / 2\Theta_{\text{max}}$     | $2.000^\circ / 50.585^\circ$                         |
| $2\Theta$ step                                                      | $0.015^\circ$                                        |
| number of parameters / restraints / constraints                     | 53 / 0 / 11                                          |
| $R_P, wR_P, R_{\text{exp}}$                                         | 0.0211, 0.0272, 0.0139                               |
| goodness of fit                                                     | 1.96                                                 |
| $R_{\text{gt}}, wR_{\text{gt}}$ ( $I > 3\sigma$ )                   | 0.0224, 0.0292                                       |
| $R_{\text{all}}, wR_{\text{all}}$                                   | 0.0225, 0.0293                                       |
| $\Delta\rho_{\text{min}}, \Delta\rho_{\text{max}} / \text{e/\AA}^3$ | -0.61, 0.61                                          |

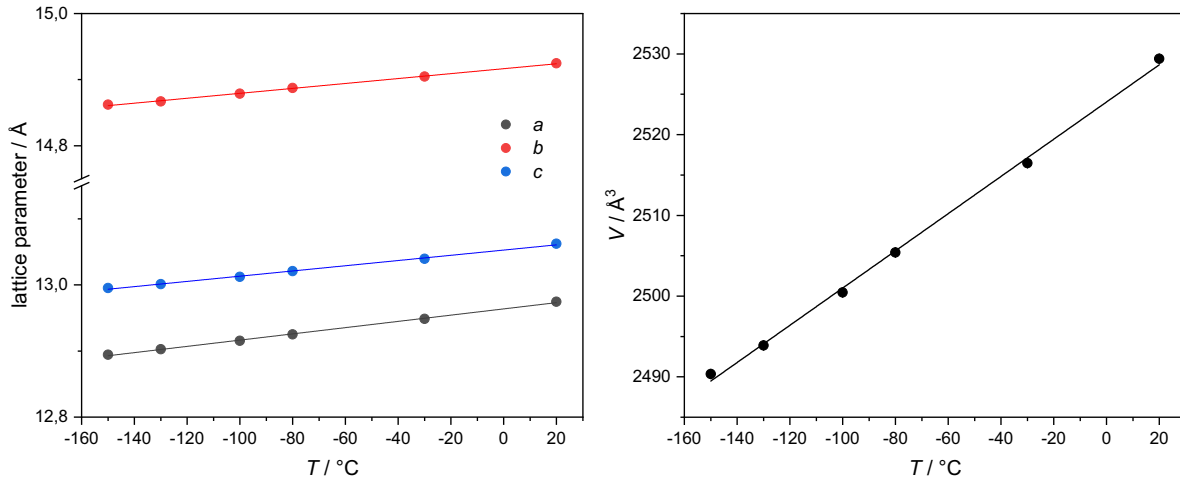

Figure S6: Lattice parameters of  $\text{Na}_{10}\text{Si}_2\text{Te}_9$  at different temperatures. The parameters were determined via le Bail refinement from powder X-ray diffraction patterns. The linear course indicates no phase transition of  $\text{Na}_{10}\text{Si}_2\text{Te}_9$  in the investigated temperature range ( $-150^\circ\text{C}$  to  $20^\circ\text{C}$ ).



Table S8: Atomic coordinates and isotropic displacement parameters for Na<sub>10</sub>Si<sub>2</sub>Te<sub>9</sub>. Displacement parameters of Na and Si were restricted to be equal.

| atom | wyck. position | $x$       | $y$       | $z$       | $U_{eq} / \text{\AA}^2$ |
|------|----------------|-----------|-----------|-----------|-------------------------|
| Na1  | $4a$           | 0.095(3)  | 0.647(2)  | 0.026(3)  | 0.063(2)                |
| Na2  | $4a$           | 0.255(3)  | 0.740(3)  | 0.377(3)  | 0.063(2)                |
| Na3  | $4a$           | 0.652(3)  | 0.031(2)  | 0.452(2)  | 0.063(2)                |
| Na4  | $4a$           | 0.417(2)  | 0.048(2)  | 0.212(2)  | 0.063(2)                |
| Na5  | $4a$           | 0.673(2)  | 0.518(2)  | 0.197(2)  | 0.063(2)                |
| Na6  | $4a$           | 0.454(2)  | 0.547(2)  | 0.500(2)  | 0.063(2)                |
| Na7  | $4a$           | 0.499(3)  | 0.236(3)  | 0.110(2)  | 0.063(2)                |
| Na8  | $4a$           | 0.215(2)  | 0.853(2)  | 0.556(2)  | 0.063(2)                |
| Na9  | $4a$           | 0.083(3)  | 0.130(3)  | 0.632(3)  | 0.063(2)                |
| Na10 | $4a$           | 0.226(3)  | 0.729(3)  | 0.821(3)  | 0.063(2)                |
| Si1  | $4a$           | 0.511(2)  | 0.349(1)  | 0.347(2)  | 0.009(3)                |
| Si2  | $4a$           | 0.505(2)  | 0.855(2)  | 0.2962(1) | 0.009(3)                |
| Te1  | $4a$           | 0.5521(5) | 0.1891(6) | 0.3218(5) | 0.031(2)                |
| Te2  | $4a$           | 0.5388(5) | 0.6885(6) | 0.3513(5) | 0.032(2)                |
| Te3  | $4a$           | 0.6657(6) | 0.4297(7) | 0.4222(5) | 0.045(3)                |
| Te4  | $4a$           | 0.4293(6) | 0.4322(6) | 0.2165(5) | 0.040(3)                |
| Te5  | $4a$           | 0.6618(6) | 0.9330(6) | 0.2418(5) | 0.029(2)                |
| Te6  | $4a$           | 0.4378(6) | 0.9281(6) | 0.4690(5) | 0.030(2)                |
| Te7  | $4a$           | 0.3740(6) | 0.3483(6) | 0.5076(5) | 0.037(3)                |
| Te8  | $4a$           | 0.3632(6) | 0.8473(6) | 0.1779(5) | 0.030(2)                |
| Te9  | $4a$           | 0.250(1)  | 0.1530(2) | 0.0903(9) | 0.044(1)                |

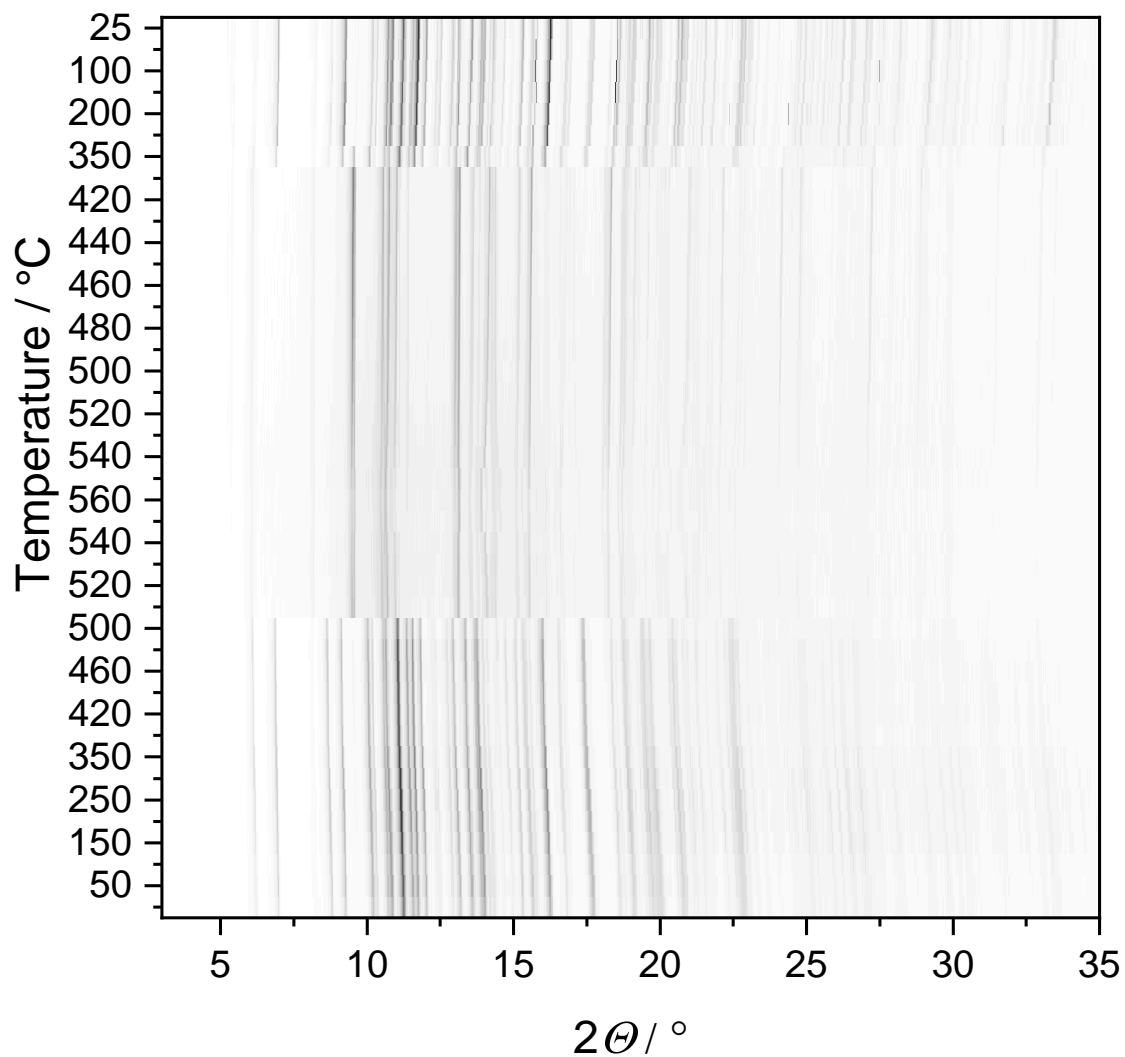

Figure S7: In situ high-temperature X-ray powder diffraction of  $\text{Na}_{10}\text{Si}_2\text{Te}_9$  in the temperature range of 25 °C to 560 °C.  $\text{Na}_{10}\text{Si}_2\text{Te}_9$  is present up to 500 °C. By further heating it decomposes and  $\text{Na}_6\text{Si}_2\text{Te}_6$  and  $\text{Na}_2\text{Te}$  is formed. Upon cooling, the partial reformation of  $\text{Na}_{10}\text{Si}_2\text{Te}_9$  can be observed.

### 3 $\text{Na}_6\text{Si}_2\text{Te}_6$

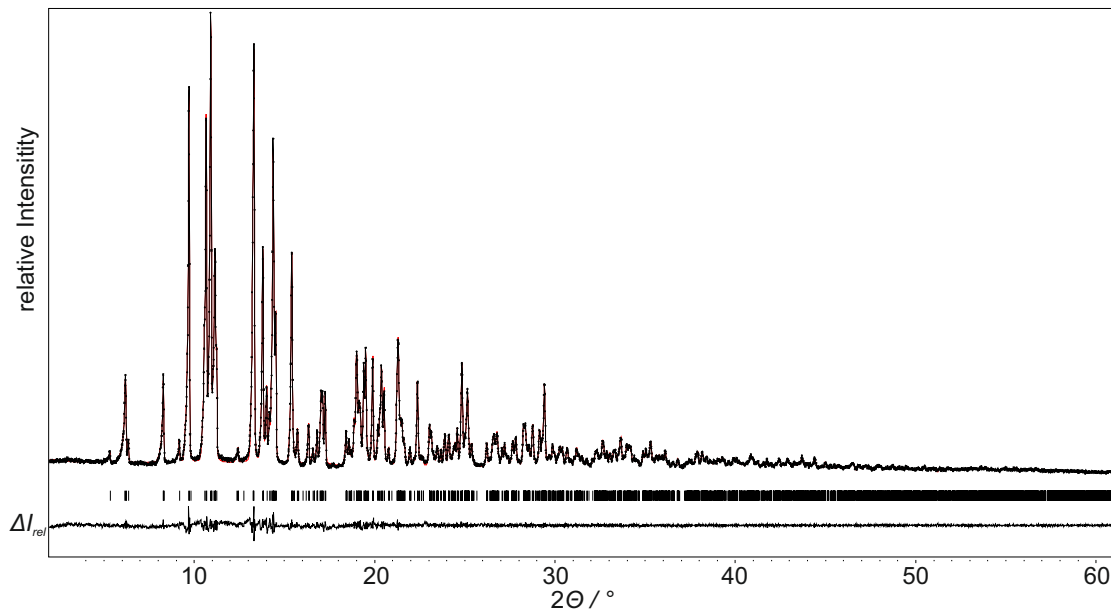

Figure S8: Refined powder diffraction pattern of  $\text{Na}_6\text{Si}_2\text{Te}_6$  with difference plot, measured with  $\text{MoK}\alpha_1$  radiation ( $\lambda = 0.7093 \text{ \AA}$ ) at room temperature. For the le Bail refinement, the structure model of Eisenmann et al. was used.<sup>S2</sup>

Table S9: Unit cell parameters and  $R$  values from the refined powder diffraction pattern of  $\text{Na}_6\text{Si}_2\text{Te}_6$ .

|                       | measured               | literature <sup>S2</sup> |
|-----------------------|------------------------|--------------------------|
| $a / \text{ \AA}$     | 8.7789(1)              | 8.786                    |
| $b / \text{ \AA}$     | 12.7801(2)             | 12.78                    |
| $c / \text{ \AA}$     | 8.8657(2)              | 8.864                    |
| $\beta / ^\circ$      | 119.749(2)             | 119.71                   |
| $V / \text{ \AA}^3$   | 863.60(3)              | 864.46                   |
| GOF                   | 1.03                   |                          |
| $R_P, wR_P, wR_{exp}$ | 0.0320, 0.0447, 0.0436 |                          |

## 4 $\text{Na}_8\text{Si}_4\text{Te}_{10}$

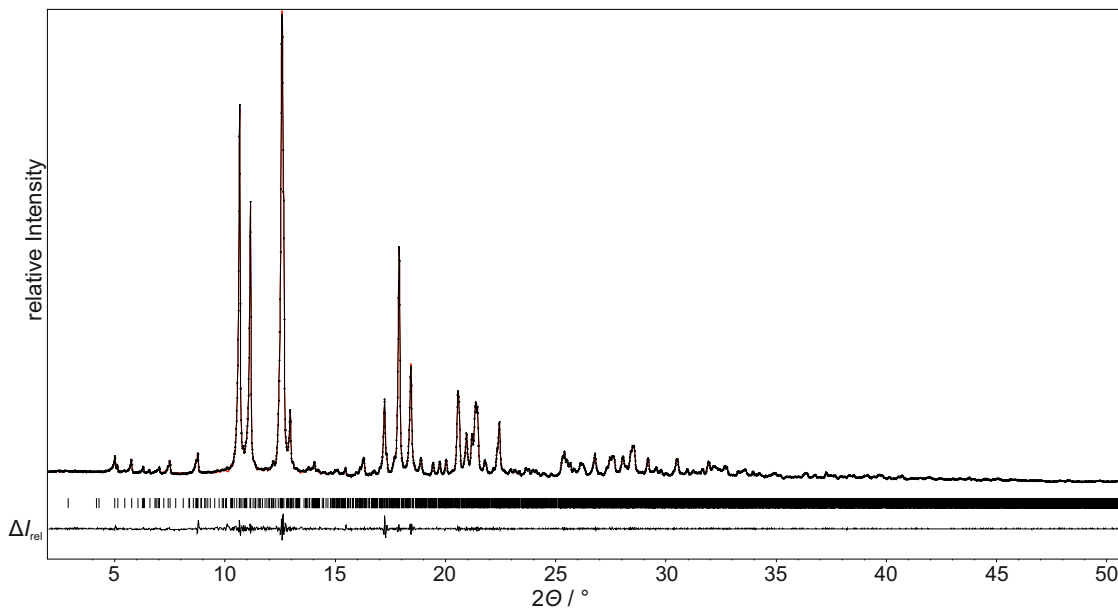

Figure S9: Refined powder diffraction pattern of  $\text{Na}_8\text{Si}_4\text{Te}_{10}$  with difference plot, measured with  $\text{MoK}\alpha_1$  radiation ( $\lambda = 0.7093 \text{ \AA}$ ) at room temperature. For the le Bail refinement, the structure model of Eisenmann et al. was used.<sup>S3</sup>

Table S10: Unit cell parameters and  $R$  values from the refined powder diffraction pattern of  $\text{Na}_8\text{Si}_4\text{Te}_{10}$ .

|                       | measured               | literature <sup>S3</sup> |
|-----------------------|------------------------|--------------------------|
| $a / \text{Å}$        | 14.0843(2)             | 14.073                   |
| $b / \text{Å}$        | 12.8408(2)             | 12.842                   |
| $c / \text{Å}$        | 14.9389(3)             | 14.882                   |
| $\beta / ^\circ$      | 92.323(2)              | 92.22                    |
| $V / \text{Å}^3$      | 2699.54(9)             | 2687.54                  |
| GOF                   | 1.73                   |                          |
| $R_P, wR_P, wR_{exp}$ | 0.0176, 0.0273, 0.0158 |                          |

## 5 Impedance Spectroscopy

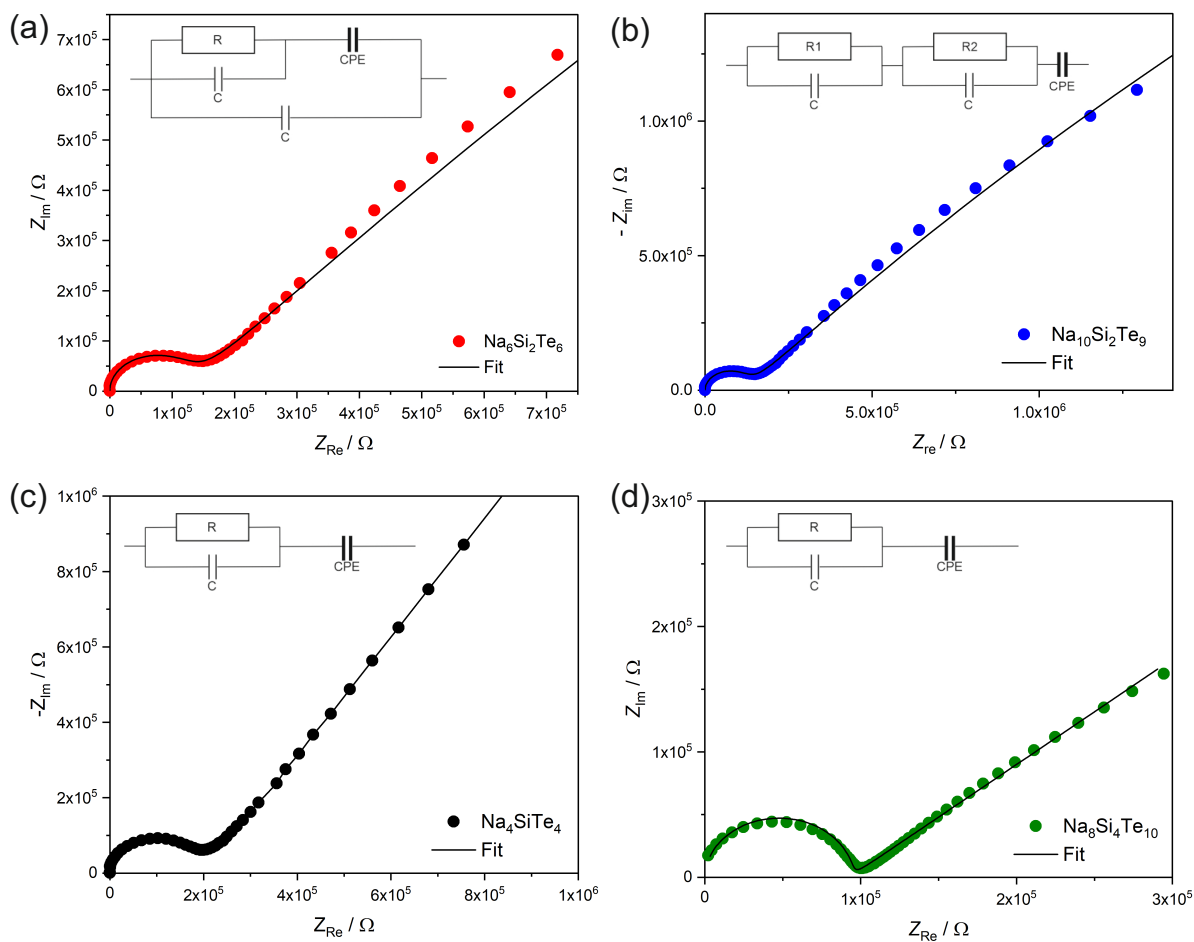

Figure S10: Nyquist plots including fit at  $100^\circ\text{C}$  for  $\text{Na}_6\text{Si}_2\text{Te}_6$  (a),  $\text{Na}_{10}\text{Si}_2\text{Te}_9$  (b),  $\text{Na}_4\text{SiTe}_4$  (c) and at  $200^\circ\text{C}$  for  $\text{Na}_8\text{Si}_4\text{Te}_{10}$  (d). Corresponding equivalent circuits for fitting of the Nyquist plots are also included.

## 6 Calculation Details

Basis sets were taken from the literature.<sup>S4-S6</sup> All basis sets are available in the basis set library at the Crystal homepage. The outer shells were adjusted so that the calculated energy was minimized. The basis sets used are as followed:

Table S11: Na basis set optimized for Na<sub>4</sub>SiTe<sub>4</sub>.

| Na         | exponent | contraction coefficient       |
|------------|----------|-------------------------------|
| <i>4sp</i> | 0.1947   | <i>s</i> : 1.0 <i>p</i> : 1.0 |
| <i>3d</i>  | 0.1      | 1.0                           |

Table S12: Si basis set optimized for Na<sub>4</sub>SiTe<sub>4</sub>.

| Si         | exponent | contraction coefficient       |
|------------|----------|-------------------------------|
| <i>6sp</i> | 0.1527   | <i>s</i> : 1.0 <i>p</i> : 1.0 |
| <i>3d</i>  | 0.3335   | 1.0                           |

Table S13: Te basis set optimized for Na<sub>4</sub>SiTe<sub>4</sub>.

| Te        | exponent | contraction coefficient |
|-----------|----------|-------------------------|
| <i>5d</i> | 0.2888   | 1.0                     |

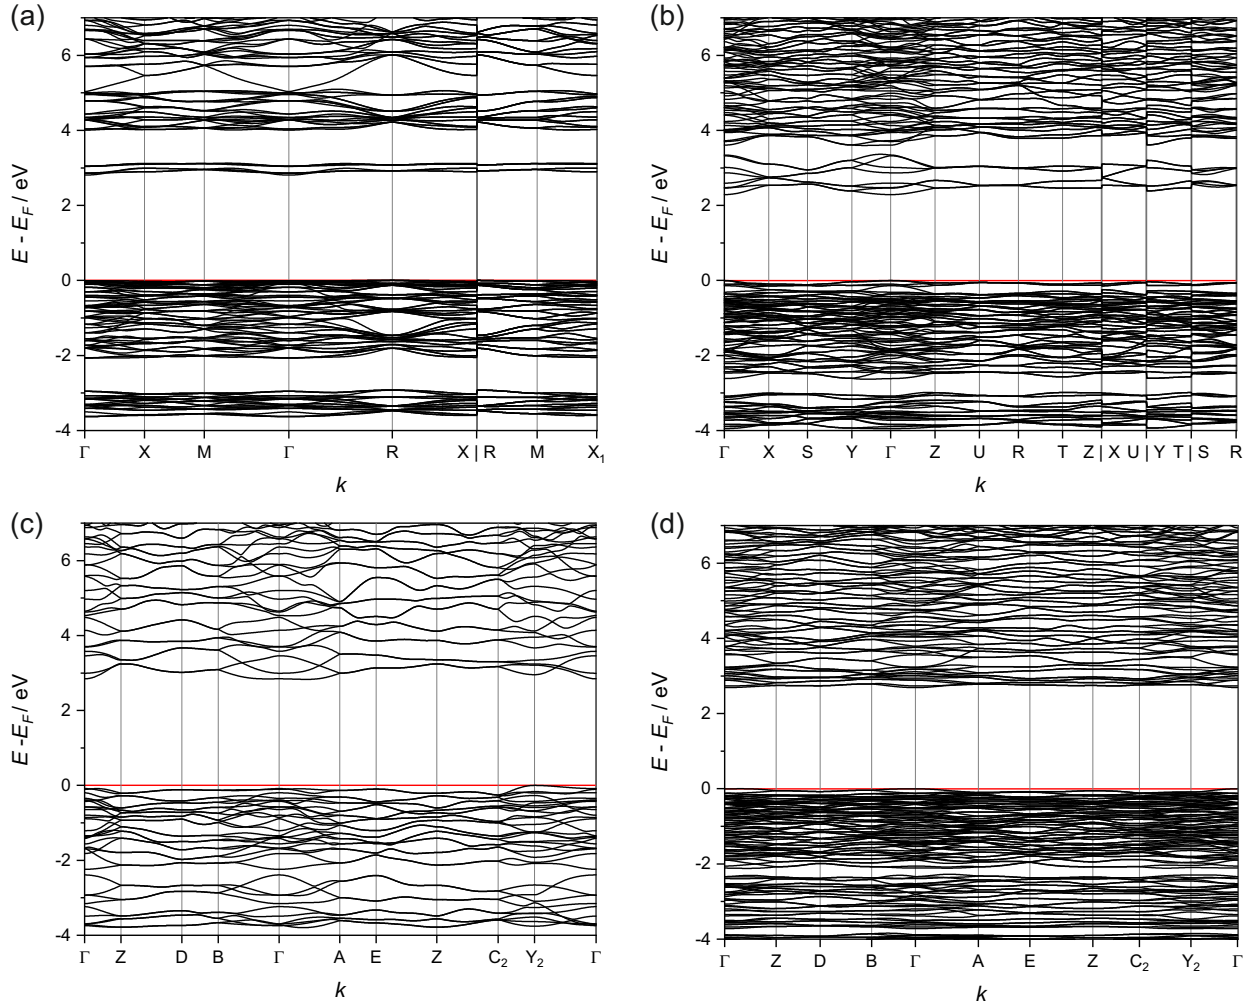

Figure S11: Calculated band structures of (a)  $\text{Na}_4\text{SiTe}_4$ , (b)  $\text{Na}_{10}\text{Si}_2\text{Te}_9$ , (c)  $\text{Na}_6\text{Si}_2\text{Te}_6$  and (d)  $\text{Na}_8\text{Si}_4\text{Te}_{10}$ .

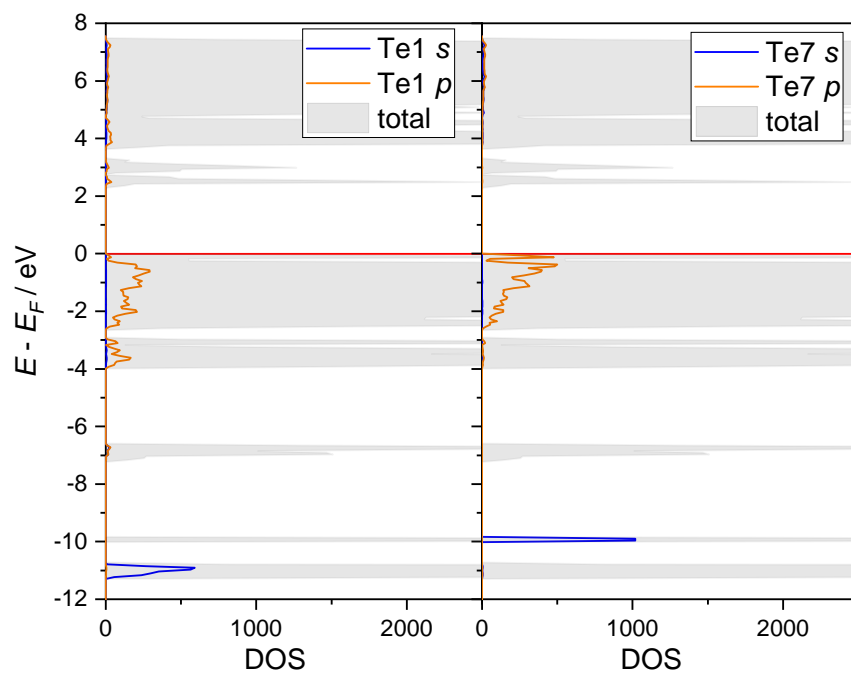

Figure S12: Orbital projected density of states for Te1 and Te7 in  $\text{Na}_{10}\text{Si}_2\text{Te}_9$ .

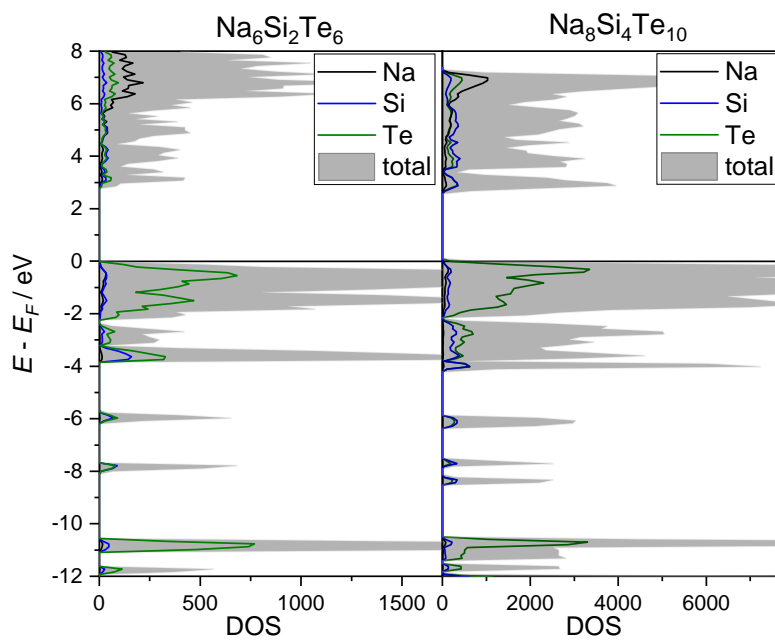

Figure S13: Electronic DOS of  $\text{Na}_6\text{Si}_2\text{Te}_6$  and  $\text{Na}_8\text{Si}_4\text{Te}_{10}$ .



## References

- (S1) CrysAlisPro (V42). Rigaku Oxford Diffraction Ltd, 2019.
- (S2) Eisenmann, B.; Schwerer, H.; Schäfer, H.  $\text{Na}_6\text{Si}_2\text{Te}_6$  - ein neues Tellurohypodisilikat /  $\text{Na}_6\text{Si}_2\text{Te}_6$  - A New Tellurohypodisilicate. *Z. Naturforsch. B* **1981**, *36*, 1538–1541.
- (S3) Eisenmann, B.; Schwerer, H.; Schäfer, H. Neuartige  $\text{Si}_4\text{Te}_{10}$ - und  $\text{Ge}_4\text{Te}_{10}$ - - Anionen im  $\text{Na}_8\text{Si}_4\text{Te}_{10}$  bzw.  $\text{Na}_8\text{Ge}_4\text{Te}_{10}$ . *Rev. chim. minér.* **1983**, *20*, 78–87.
- (S4) Sophia, G.; Baranek, P.; Sarrazin, C.; Rerat, M.; Dovesi, R. [https://www.crystal.unito.it/Basis\\_Sets/sodium.html](https://www.crystal.unito.it/Basis_Sets/sodium.html), 2014; Accessed: 2023-03-06.
- (S5) Porter, A. R.; Towler, M. D.; Needs, R. J. Muonium as a hydrogen analogue in silicon and germanium: Quantum effects and hyperfine parameters. *Phys. Rev. B* **1999**, *60*, 13534–13546.
- (S6) Heyd, J.; Peralta, J. E.; Scuseria, G. E.; Martin, R. L. Energy band gaps and lattice parameters evaluated with the Heyd-Scuseria-Ernzerhof screened hybrid functional. *J. Chem. Phys.* **2005**, *123*, 174101.
